# Supplementary material for: Treatment with a GSK-3β/HDAC Dual Inhibitor Restores Neuronal Survival and Maturation in an In Vitro and In Vivo Model of CDKL5 Deficiency Disorder
Source: MDPI journal article supplement (doi:10.3390/ijms22115950), 2021-05-31
Supplement: s1 [file s1]

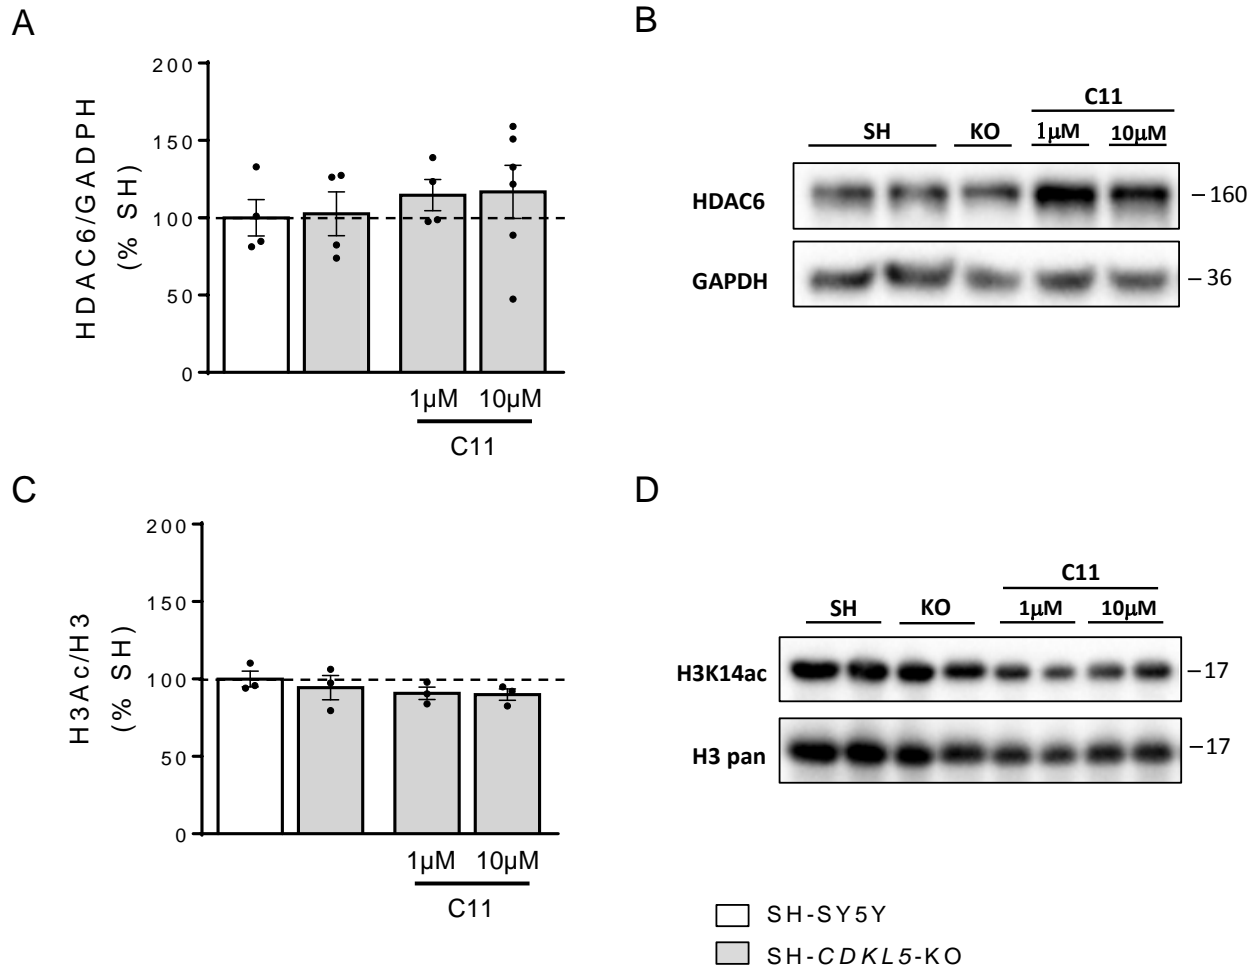

**Figure S1. Effect of treatment with C11 on HDAC6 and acetylated H3 Histone levels in SH-CDKL5-KO cells.** (A-D) Western blot analysis of HDAC6 and acetylated H3 Histone (H3Ac) levels in protein extracts from parental SH-SY5Y cells (SH), SH-CDKL5-KO cells (SKO) and SH-CDKL5-KO cells treated with C11 (1 µM or 10 µM) for 24 h. Immunoblots (B,D) are examples from two biological replicates of each experimental condition. Histograms on the left show HDAC6 protein levels normalized to GAPDH and H3Ac protein levels normalized to corresponding total protein levels (H3). Data are expressed as a percentage of parental cells. Values are represented as means SE.

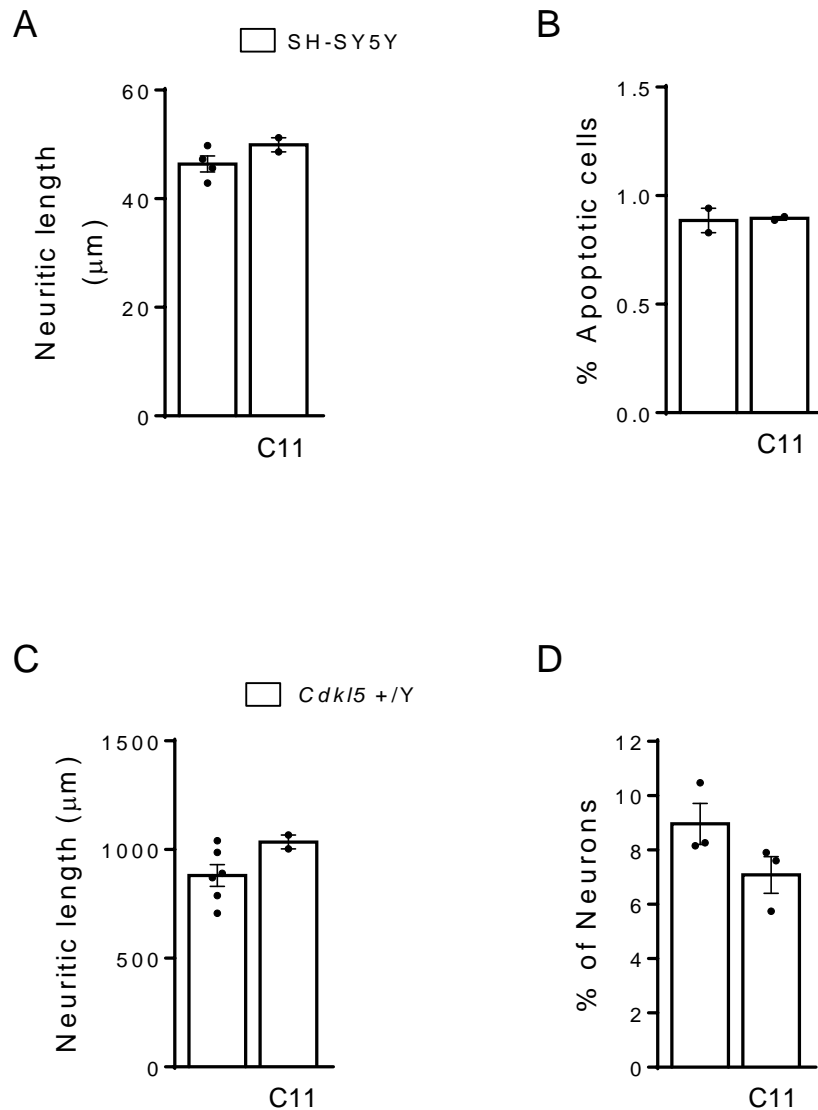

**Figure S2. Effect of treatment with C11 on cell differentiation, proliferation and survival in SH-CDKL5 cells and wild-type hippocampal neurons.**

(A) Quantification of neurite outgrowth of SH-SY5Y cells treated daily with retinoic acid (RA; 10  $\mu\text{M}$ ,  $n = 4$ ) for 5 days. Cells were treated with C11 (10  $\mu\text{M}$ ,  $n = 2$ ) every 2 days during retinoic acid differentiation. (B) Percentage of pyknotic nuclei in proliferating SH-SY5Y cells ( $n = 2$ ); cells were treated with C11 (10  $\mu\text{M}$ ,  $n = 2$ ) for 24 h. (C) Quantification of the total length of MAP2-positive cells from 10-day differentiated (DIV10) hippocampal neurons of *Cdkl5* +/Y mice. On day 2 post-plating (DIV2) hippocampal cultures were treated with vehicle (0.1% DMSO in PBS; *Cdkl5* +/Y;  $n = 6$ ) or C11 (10  $\mu\text{M}$ ;  $n = 2$ ), which was then administered on alternate days throughout the entire differentiation period. (D) Quantitative analysis of the number of MAP2-positive cells in vehicle-treated ( $n = 3$ ) and C11-treated (C11;  $n = 3$ ) hippocampal cultures from *Cdkl5* +/Y mice. Values are represented as mean  $\pm$  SE.

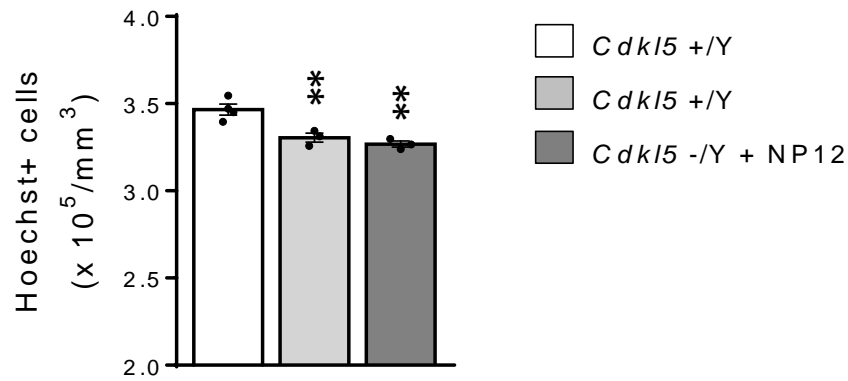

**Figure S3. Effect of treatment with NP12 on neuronal survival in the hippocampus of *Cdkl5* -/Y mice.**

(A) Quantification of Hoechst-positive cells in CA1 layer of hippocampal sections from vehicle-treated (*Cdkl5* +/Y; n = 4, *Cdkl5* -/Y; n = 5) and NP12-treated (*Cdkl5* -/Y + NP12; n = 4) mice, derived from animals used in [26]. Briefly, starting from 3 weeks of age, *Cdkl5* +/Y and *Cdkl5* -/Y mice were treated either with vehicle (corn oil) or with NP12 (20 mg/kg), administered by subcutaneous injection every other day for 20 days. Values are represented as means  $\pm$ SE. \*\*p<0.01 (Fisher's LSD test after one-way ANOVA).

**Supplementary Table 1**

| <b>Antibody against</b>                  | <b>Description</b> | <b>Dilution</b> | <b>Product nr and Manufacturer</b>                           | <b>Use *</b> |
|------------------------------------------|--------------------|-----------------|--------------------------------------------------------------|--------------|
| gamma H2A.X (phospho S139)               | Rabbit polyclonal  | 1:1000          | ab11174, Abcam                                               | WB           |
| phospho-AKT- Ser473                      | Rabbit polyclonal  | 1:1000          | 4060, Cell Signaling Technology                              | WB           |
| AKT                                      | Rabbit polyclonal  | 1:1000          | 4061, Cell Signaling Technology                              | WB           |
| phospho-GSK-3 $\beta$ (Ser9) (D85E12) XP | Rabbit polyclonal  | 1:1000          | 5558, Cell Signaling Technology                              | WB           |
| GSK-3 $\beta$ (27C10)                    | Rabbit polyclonal  | 1:1000          | 9315, Cell Signaling Technology                              | WB           |
| Tubulin, Acetylated                      | Mouse monoclonal   | 1:1000          | T6793, Sigma-Aldrich                                         | WB           |
| $\alpha$ -Tubulin                        | Mouse monoclonal   | 1:1000          | T5168, Sigma-Aldrich                                         | WB           |
| phospho-CRMP-2 (Thr514)                  | Rabbit polyclonal  | 1:1000          | 9397, Cell Signaling Technology                              | WB           |
| CRMP-2                                   | Rabbit polyclonal  | 1:1000          | 9393, Cell Signaling Technology                              | WB           |
| H3K9/14ac                                | Rabbit polyclonal  | 1:500           | C15410005, Diagenode                                         | WB           |
| Histone H3, CT, pan                      | Rabbit monoclonal  | 1:1000          | 05-928, Merck Millipore, Burlington, MA, USA                 | WB           |
| CDKL5                                    | Sheep polyclonal   | 1:1000          | SA145, MRC PPU reagent and service, University of Dundee, UK | WB           |
| HDAC6                                    | Rabbit polyclonal  | 1:1001          | E-AB-63502, Elabscience                                      | WB           |
| GAPDH                                    | Rabbit polyclonal  | 1:5000          | G9545, Sigma-Aldrich                                         | WB           |
| NeuN , clone A60                         | Mouse monoclonal   | 1:250           | MAB377, Merck Millipore, Burlington, MA, USA                 | IF           |
| IBA1 Antibody (AIF-1)                    | Rabbit polyclonal  | 1:300           | PA5-21274, ThermoFisher Scientific                           | IF           |
| PSD95                                    | Mouse monoclonal   | 1:1000          | ab2723, Abcam                                                | IF           |
| Microtubule-Associated Protein 2 (MAP2)  | Rabbit polyclonal  | 1:100           | AB5622, Merck Millipore, Burlington, MA, USA                 | IF           |
| <b>Secondary antibodies</b>              |                    |                 |                                                              |              |
| <b>Antibody</b>                          | <b>Conjugate</b>   | <b>Dilution</b> | <b>Product nr and Manufacturer</b>                           | <b>Use*</b>  |
| Goat Anti-Rabbit IgG                     | HRP                | 1:5000          | 111-035-003, Jackson Im- munoResearch Laboratories, Inc.     | WB           |
| Donkey Anti-Sheep IgG                    | HRP                | 1:5000          | 713-005-147, Jackson Im- munoResearch Laboratories, Inc.     | WB           |
| Goat Anti-Mouse IgG                      | HRP                | 1:5000          | 115-005-003, Jackson Im- munoResearch Laboratories, Inc.     | WB           |
| Goat Anti-Mouse IgG                      | Cy3                | 1:200           | 115-165-062, Jackson Im- munoResearch Laboratories, Inc.     | IF           |
| Donkey Anti-Rabbit IgG                   | Cy3                | 1:200           | 711-165-152, Jackson Im- munoResearch Laboratories, Inc.     | IF           |

\*WB, western blot; IF, immunofluorescent staining
